# Supplementary material
Source: publisher figshare collection journal article supplement (https://tandf.figshare.com/articles/dataset/_/7924361)
Supplement: Supplementary file 1 [file 1]

Database S2 from Biplot approach with self-incompatibility analyses of sib diallel cross data for *Lysimachia monelli* (Primulaceae)

Database S2. *Lysimachia monelli* diallel D4R Info-Gen database.  
Genotype Environment Interaction [Version 15/09/2013]

| Mother | Father-pollen | Fruit set |
|--------|---------------|-----------|
| M6     | P6            | 0         |
| M6     | P7            | 0         |
| M6     | P11           | 0         |
| M6     | P8            | 1         |
| M6     | P9            | 1         |
| M6     | P10           | 1         |
| M6     | P12           | 1         |
| M7     | P6            | 0         |
| M7     | P7            | 0         |
| M7     | P11           | 0         |
| M7     | P8            | 1         |
| M7     | P9            | 1         |
| M7     | P10           | 1         |
| M7     | P12           | 1         |
| M11    | P6            | 0         |
| M11    | P7            | 0         |
| M11    | P11           | 0         |
| M11    | P8            | 1         |
| M11    | P9            | 1         |
| M11    | P10           | 1         |
| M11    | P12           | 1         |
| M8     | P6            | 1         |
| M8     | P7            | 1         |
| M8     | P11           | 1         |
| M8     | P8            | 0         |
| M8     | P9            | 0         |
| M8     | P10           | 0         |
| M8     | P12           | 0         |
| M9     | P6            | 1         |
| M9     | P7            | 1         |
| M9     | P11           | 1         |
| M9     | P8            | 0         |
| M9     | P9            | 0         |
| M9     | P10           | 0         |
| M9     | P12           | 0         |
| M10    | P6            | 1         |
| M10    | P7            | 1         |
| M10    | P11           | 1         |
| M10    | P8            | 0         |
| M10    | P9            | 0         |
| M10    | P10           | 0         |
| M10    | P12           | 0         |
| M12    | P6            | 1         |
| M12    | P7            | 1         |
| M12    | P11           | 1         |
| M12    | P8            | 0         |
| M12    | P9            | 0         |
| M12    | P10           | 0         |
| M12    | P12           | 0         |
