# Supplementary material
Source: publisher figshare collection journal article supplement (https://tandf.figshare.com/articles/dataset/_/7924361)
Supplement: Supplementary file 2 [file 1]

Figure S1 from Biplot approach with self-incompatibility analyses of sib diallel cross data for *Lysimachia monelli* (Primulaceae)

**Figure S1** *Lysimachia (Anagallis) monelli*. Reproduced by permission of Nature Publishing Group: Heredity 87: 589-597 (2001)

| ♀ \ ♂ |    | D4            |               |               |               | D4R           |               |               |               |               |               |               |
|-------|----|---------------|---------------|---------------|---------------|---------------|---------------|---------------|---------------|---------------|---------------|---------------|
|       |    | 2             | 5             | 3             | 4             | 6             | 7             | 11            | 8             | 9             | 10            | 12            |
| D4    | 2  | $\frac{0}{1}$ | $\frac{0}{2}$ | $\frac{2}{2}$ | $\frac{2}{2}$ | $\frac{2}{2}$ | $\frac{2}{2}$ | $\frac{2}{2}$ | —             | $\frac{2}{2}$ | $\frac{2}{2}$ | $\frac{2}{2}$ |
|       | 5  | $\frac{0}{2}$ | $\frac{0}{2}$ | $\frac{2}{2}$ | $\frac{2}{2}$ | $\frac{2}{2}$ | $\frac{2}{2}$ | $\frac{2}{2}$ | —             | $\frac{2}{2}$ | $\frac{2}{2}$ | $\frac{2}{2}$ |
|       | 3  | $\frac{2}{2}$ | $\frac{2}{2}$ | $\frac{0}{2}$ | $\frac{0}{2}$ | $\frac{0}{2}$ | $\frac{0}{5}$ | $\frac{0}{5}$ | $\frac{1}{1}$ | $\frac{2}{2}$ | $\frac{2}{2}$ | $\frac{2}{2}$ |
|       | 4  | $\frac{2}{2}$ | $\frac{2}{2}$ | $\frac{0}{2}$ | $\frac{0}{2}$ | $\frac{0}{4}$ | $\frac{0}{2}$ | $\frac{0}{2}$ | $\frac{1}{1}$ | $\frac{2}{2}$ | $\frac{2}{2}$ | $\frac{2}{2}$ |
| D4R   | 6  | $\frac{2}{2}$ | $\frac{2}{2}$ | $\frac{0}{2}$ | $\frac{0}{4}$ | $\frac{0}{2}$ | $\frac{0}{2}$ | $\frac{0}{2}$ | $\frac{1}{1}$ | $\frac{2}{2}$ | $\frac{2}{2}$ | $\frac{2}{2}$ |
|       | 7  | $\frac{2}{2}$ | $\frac{2}{2}$ | $\frac{0}{5}$ | $\frac{0}{2}$ | $\frac{0}{2}$ | $\frac{0}{2}$ | $\frac{0}{5}$ | $\frac{1}{1}$ | $\frac{2}{2}$ | $\frac{2}{2}$ | $\frac{2}{2}$ |
|       | 11 | $\frac{2}{2}$ | $\frac{2}{2}$ | $\frac{0}{5}$ | $\frac{0}{2}$ | $\frac{0}{2}$ | $\frac{0}{5}$ | $\frac{0}{2}$ | $\frac{1}{1}$ | $\frac{2}{2}$ | $\frac{2}{2}$ | $\frac{2}{2}$ |
|       | 8  | $\frac{1}{1}$ | $\frac{1}{1}$ | $\frac{1}{1}$ | $\frac{1}{1}$ | $\frac{3}{3}$ | $\frac{2}{2}$ | $\frac{1}{1}$ | $\frac{0}{2}$ | $\frac{0}{1}$ | $\frac{0}{1}$ | $\frac{0}{1}$ |
|       | 9  | $\frac{2}{2}$ | $\frac{0}{1}$ | $\frac{0}{2}$ | $\frac{0}{2}$ | $\frac{0}{2}$ |
|       | 10 | $\frac{2}{2}$ | $\frac{0}{1}$ | $\frac{0}{2}$ | $\frac{0}{2}$ | $\frac{0}{2}$ |
|       | 12 | $\frac{2}{2}$ | $\frac{0}{1}$ | $\frac{0}{2}$ | $\frac{0}{2}$ | $\frac{0}{2}$ |
|       |    |               |               |               |               |               |               |               |               |               |               |               |

incompatible
  compatible
 

—

 no data

**Fig. 4** *Anagallis monelli*: results of full sib diallel in families D4 (2–5) and reciprocal D4R (6–12) and D4 + D4R (0/2, etc. = number of fruits/number of pollinations). Reciprocal differences in incompatibility between types are indicated by shaded cells. Numbered progeny have been rearranged into incompatibility types, based upon crossing relationships.

**Figure S2** *Lysimachia (Anagallis) monelli*. Reproduced by permission of Nature Publishing Group: Heredity 87: 589-597 (2001)

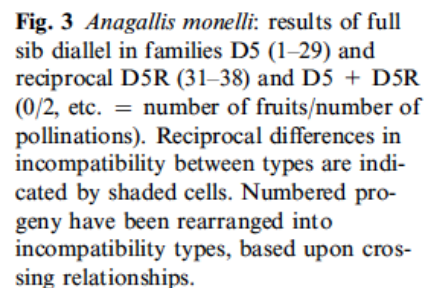

Figure S3 from Biplot approach with self-incompatibility analyses of sib diallel cross data for *Lysimachia monelli* (Primulaceae)

Figure S3 *Lysimachia* (*Anagallis*) *monelli*. Reproduced by permission of Nature Publishing Group: Heredity 87: 589-597 (2001)

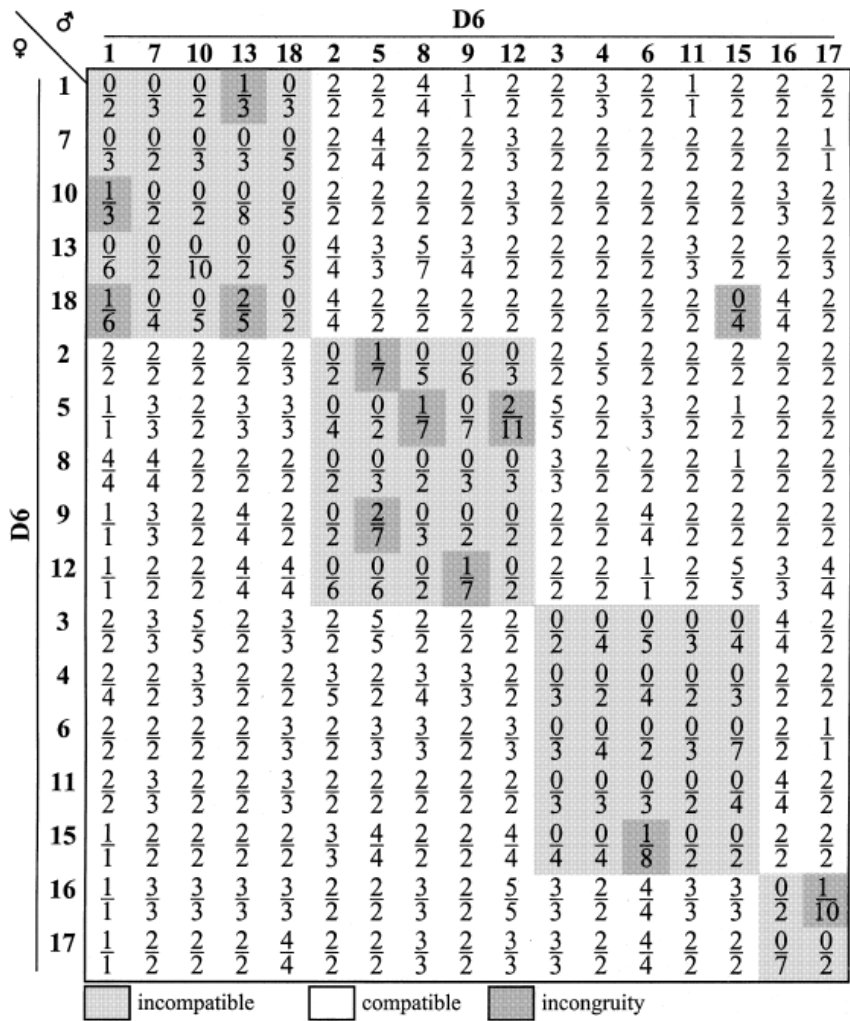

Fig. 6 *Anagallis monelli*: results of full sib diallel in families D6 (0/2, etc. = number of fruits/number of pollinations). Reciprocal differences in incompatibility between types are indicated by shaded cells. Numbered progeny have been rearranged into incompatibility types, based upon crossing relationships.
