# Supplementary material
Source: publisher figshare collection journal article supplement (https://tandf.figshare.com/articles/dataset/_/7924361)
Supplement: Supplementary file 3 [file 1]

**Table S2c from Biplot approach with self-incompatibility analyses of sib diallel cross data for *Lysimachia monelli* (Primulaceae)**

**Table S2c.** *Lysimachia monelli*. Diallel cross D5xD5R, results for eigen values, proportion and cumulative proportion. Software Info-Gen, Genotype Environment Interaction [Version 15/09/2013]

| lambda | values  | proportion | cum. prop. |
|--------|---------|------------|------------|
| 1      | 5.21    | 0.74       | 0.74       |
| 2      | 0.76    | 0.11       | 0.85       |
| 3      | 0.21    | 0.03       | 0.88       |
| 4      | 0.13    | 0.02       | 0.90       |
| 5      | 0.10    | 0.01       | 0.91       |
| 6      | 0.09    | 0.01       | 0.92       |
| 7      | 0.08    | 0.01       | 0.93       |
| 8      | 0.06    | 0.01       | 0.94       |
| 9      | 0.05    | 0.01       | 0.95       |
| 10     | 0.05    | 0.01       | 0.96       |
| 11     | 0.04    | 0.01       | 0.96       |
| 12     | 0.04    | 0.01       | 0.97       |
| 13     | 0.03    | 4.0E-03    | 0.97       |
| 14     | 0.03    | 3.7E-03    | 0.98       |
| 15     | 0.02    | 3.0E-03    | 0.98       |
| 16     | 0.02    | 2.8E-03    | 0.98       |
| 17     | 0.02    | 2.8E-03    | 0.99       |
| 18     | 0.02    | 2.4E-03    | 0.99       |
| 19     | 0.02    | 2.2E-03    | 0.99       |
| 20     | 0.01    | 2.1E-03    | 0.99       |
| 21     | 0.01    | 1.7E-03    | 0.99       |
| 22     | 0.01    | 1.4E-03    | 1.00       |
| 23     | 0.01    | 1.0E-03    | 1.00       |
| 24     | 0.01    | 8.8E-04    | 1.00       |
| 25     | 0.01    | 7.2E-04    | 1.00       |
| 26     | 4.2E-03 | 6.0E-04    | 1.00       |
| 27     | 3.6E-03 | 5.1E-04    | 1.00       |
| 28     | 2.9E-03 | 4.1E-04    | 1.00       |
| 29     | 2.0E-03 | 2.8E-04    | 1.00       |
| 30     | 1.6E-03 | 2.2E-04    | 1.00       |
| 31     | 5.3E-04 | 7.5E-05    | 1.00       |
| 32     | 4.1E-04 | 5.8E-05    | 1.00       |
| 33     | 3.0E-04 | 4.3E-05    | 1.00       |
| 34     | 9.4E-05 | 1.3E-05    | 1.00       |
| 35     | 2.9E-05 | 4.1E-06    | 1.00       |
| 36     | 0.00    | 0.00       | 1.00       |
| 37     | 0.00    | 0.00       | 1.00       |
