# Supplementary material
Source: publisher figshare collection journal article supplement (https://tandf.figshare.com/articles/dataset/_/7924361)
Supplement: Supplementary file 5 [file 1]

Database S3 from Biplot approach with self-incompatibility analyses of sib diallel cross data for *Lysimachia monelli* (Primulaceae)

Database S3. *Lysimachia monelli* diallel D4xD4R Info-Gen database.  
Genotype Environment Interaction [Version 15/09/2013]

| Mother | Father-pollen | Fruit set |
|--------|---------------|-----------|
| M2     | P2            | 0         |
| M2     | P5            | 0         |
| M2     | P3            | 1         |
| M2     | P4            | 1         |
| M2     | P6            | 1         |
| M2     | P7            | 1         |
| M2     | P11           | 1         |
| M2     | P9            | 1         |
| M2     | P10           | 1         |
| M2     | P12           | 1         |
| M3     | P2            | 1         |
| M3     | P5            | 1         |
| M3     | P3            | 0         |
| M3     | P4            | 0         |
| M3     | P6            | 0         |
| M3     | P7            | 0         |
| M3     | P11           | 0         |
| M3     | P8            | 1         |
| M3     | P9            | 1         |
| M3     | P10           | 1         |
| M3     | P12           | 1         |
| M4     | P2            | 1         |
| M4     | P5            | 1         |
| M4     | P3            | 0         |
| M4     | P4            | 0         |
| M4     | P6            | 0         |
| M4     | P7            | 0         |
| M4     | P11           | 0         |
| M4     | P8            | 1         |
| M4     | P9            | 1         |
| M4     | P10           | 1         |
| M4     | P12           | 1         |
| M5     | P2            | 0         |
| M5     | P5            | 0         |
| M5     | P3            | 1         |
| M5     | P4            | 1         |
| M5     | P6            | 1         |
| M5     | P7            | 1         |
| M5     | P11           | 1         |
| M5     | P9            | 1         |
| M5     | P10           | 1         |
| M5     | P12           | 1         |
| M6     | P2            | 1         |
| M6     | P5            | 1         |
| M6     | P3            | 0         |
| M6     | P4            | 0         |
| M6     | P6            | 0         |
| M6     | P7            | 0         |
| M6     | P11           | 0         |
| M6     | P8            | 1         |
| M6     | P9            | 1         |
| M6     | P10           | 1         |
| M6     | P12           | 1         |
| M7     | P2            | 1         |
| M7     | P5            | 1         |
| M7     | P3            | 0         |

|     |     |   |
|-----|-----|---|
| M7  | P4  | 0 |
| M7  | P6  | 0 |
| M7  | P7  | 0 |
| M7  | P11 | 0 |
| M7  | P8  | 1 |
| M7  | P9  | 1 |
| M7  | P10 | 1 |
| M7  | P12 | 1 |
| M8  | P2  | 1 |
| M8  | P5  | 1 |
| M8  | P3  | 1 |
| M8  | P4  | 1 |
| M8  | P6  | 1 |
| M8  | P7  | 1 |
| M8  | P11 | 1 |
| M8  | P8  | 0 |
| M8  | P9  | 0 |
| M8  | P10 | 0 |
| M8  | P12 | 0 |
| M9  | P2  | 1 |
| M9  | P5  | 1 |
| M9  | P3  | 1 |
| M9  | P4  | 1 |
| M9  | P6  | 1 |
| M9  | P7  | 1 |
| M9  | P11 | 1 |
| M9  | P8  | 0 |
| M9  | P9  | 0 |
| M9  | P10 | 0 |
| M9  | P12 | 0 |
| M10 | P2  | 1 |
| M10 | P5  | 1 |
| M10 | P3  | 1 |
| M10 | P4  | 1 |
| M10 | P6  | 1 |
| M10 | P7  | 1 |
| M10 | P11 | 1 |
| M10 | P8  | 0 |
| M10 | P9  | 0 |
| M10 | P10 | 0 |
| M10 | P12 | 0 |
| M11 | P2  | 1 |
| M11 | P5  | 1 |
| M11 | P3  | 0 |
| M11 | P4  | 0 |
| M11 | P6  | 0 |
| M11 | P7  | 0 |
| M11 | P11 | 0 |
| M11 | P8  | 1 |
| M11 | P9  | 1 |
| M11 | P10 | 1 |
| M11 | P12 | 1 |
| M12 | P2  | 1 |
| M12 | P5  | 1 |
| M12 | P3  | 1 |
| M12 | P4  | 1 |
| M12 | P6  | 1 |
| M12 | P7  | 1 |
| M12 | P11 | 1 |
| M12 | P8  | 0 |
| M12 | P9  | 0 |
| M12 | P10 | 0 |
| M12 | P12 | 0 |
|     |     |   |
