# Supplementary material
Source: publisher figshare collection journal article supplement (https://tandf.figshare.com/articles/dataset/_/7924361)
Supplement: Supplementary file 6 [file 1]

**Table S1b** from Biplot approach with self-incompatibility analyses of sib diallel cross data for *Lysimachia monelli* (Primulaceae)

**Table S1b.** *Lysimachia monelli*. Diallel cross D4R, results for eigen values, proportion and cumulative proportion. Software Info-Gen, Genotype Environment Interaction [Version 15/09/2013]

| lambda | value | proportion | cum. prop. |
|--------|-------|------------|------------|
| 1      | 2.00  | 1.00       | 1.00       |
| 2      | 0.00  | 0.00       | 1.00       |
| 3      | 0.00  | 0.00       | 1.00       |
| 4      | 0.00  | 0.00       | 1.00       |
| 5      | 0.00  | 0.00       | 1.00       |
| 6      | 0.00  | 0.00       | 1.00       |
| 7      | 0.00  | 0.00       | 1.00       |
