# Supplementary material
Source: publisher figshare collection journal article supplement (https://tandf.figshare.com/articles/dataset/_/7924361)
Supplement: Supplementary file 7 [file 1]

Database S5 from Biplot approach with self-incompatibility analyses of sib diallel cross data for *Lysimachia monelli* (Primulaceae)

Database S5. *Lysimachia monelli* diallel D5R Info-Gen database.  
Genotype Environment Interaction [Version 15/09/2013]

| Mother | Father-pollen | Fruit set |
|--------|---------------|-----------|
| M31    | P31           | 0.0625    |
| M31    | P34           | 0         |
| M31    | P36           | 0.1       |
| M31    | P39           | 0.1111    |
| M31    | P30           | 0.385     |
| M31    | P35           | 0.375     |
| M31    | P38           | 0.25      |
| M34    | P31           | 0         |
| M34    | P34           | 0         |
| M34    | P36           | 0         |
| M34    | P39           | 0         |
| M34    | P30           | 1         |
| M34    | P35           | 0.5       |
| M34    | P39           | 0.3333    |
| M36    | P31           | 0.1       |
| M36    | P34           | 0         |
| M36    | P36           | 0         |
| M36    | P39           | 0         |
| M36    | P30           | 0.625     |
| M36    | P35           | 0.8571    |
| M36    | P38           | 0.667     |
| M39    | P31           | 0         |
| M39    | P34           | 0         |
| M39    | P36           | 0         |
| M39    | P39           | 0         |
| M39    | P30           | 1         |
| M39    | P35           | 0.8333    |
| M39    | P38           | 1         |
| M30    | P31           | 0.7272    |
| M30    | P34           | 0.4       |
| M30    | P36           | 0.5       |
| M30    | P39           | 0.375     |
| M30    | P30           | 0         |
| M30    | P35           | 0.1       |
| M30    | P38           | 0         |
| M35    | P31           | 0.8333    |
| M35    | P34           | 1         |
| M35    | P36           | 0.6       |
| M35    | P39           | 1         |
| M35    | P30           | 0         |
| M35    | P35           | 0         |
| M35    | P38           | 0         |
| M38    | P31           | 0.8889    |
| M38    | P34           | 1         |
| M38    | P36           | 0.8333    |
| M38    | P39           | 1         |
| M38    | P30           | 0         |
| M38    | P35           | 0         |
| M38    | P38           | 0         |
