# Supplementary material
Source: publisher figshare collection journal article supplement (https://tandf.figshare.com/articles/dataset/_/7924361)
Supplement: Supplementary file 8 [file 1]

Archive with 15 entries (15 files):
- tplb_a_1587540_sm8616.pdf
- tplb_a_1587540_sm8617.pdf
- tplb_a_1587540_sm8618.pdf
- tplb_a_1587540_sm8619.pdf
- tplb_a_1587540_sm8620.pdf
- tplb_a_1587540_sm8621.pdf
- tplb_a_1587540_sm8622.pdf
- tplb_a_1587540_sm8623.pdf
- tplb_a_1587540_sm8624.pdf
- tplb_a_1587540_sm8625.pdf
- tplb_a_1587540_sm8626.pdf
- tplb_a_1587540_sm8627.pdf
- tplb_a_1587540_sm8628.pdf
- tplb_a_1587540_sm8629.pdf
- tplb_a_1587540_sm8630.pdf
