# Supplementary material
Source: publisher figshare collection journal article supplement (https://tandf.figshare.com/articles/dataset/_/7924361)
Supplement: Supplementary file 8 [file 1 › tplb_a_1587540_sm8617.pdf]

Database S1 from Biplot approach with self-incompatibility analyses of sib diallel cross data for *Lysimachia monelli* (Primulaceae)

Database S1. *Lysimachia monelli* diallel D4 Info-Gen database.  
Genotype Environment Interaction [Version 15/09/2013]

| Mother | Father-pollen | Fruit set |
|--------|---------------|-----------|
| M2     | P2            | 0         |
| M2     | P5            | 0         |
| M2     | P3            | 1         |
| M2     | P4            | 1         |
| M5     | P2            | 0         |
| M5     | P5            | 0         |
| M5     | P3            | 1         |
| M5     | P4            | 1         |
| M3     | P2            | 1         |
| M3     | P5            | 1         |
| M3     | P3            | 0         |
| M3     | P4            | 0         |
| M4     | P2            | 1         |
| M4     | P5            | 1         |
| M4     | P3            | 0         |
| M4     | P4            | 0         |
