# Supplementary material
Source: publisher figshare collection journal article supplement (https://tandf.figshare.com/articles/dataset/_/7924361)
Supplement: Supplementary file 8 [file 1 › tplb_a_1587540_sm8620.pdf]

Database S4 from Biplot approach with self-incompatibility analyses of sib diallel cross data for *Lysimachia monelli* (Primulaceae)

Database S4. *Lysimachia monelli* diallel D5 Info-Gen database.  
Genotype Environment Interaction [Version 15/09/2013]

| Mother | Father-pollen | Fruit set |  |
|--------|---------------|-----------|--|
| M1     | P1            | 0         |  |
| M1     | P8            | 0         |  |
| M1     | P9            | 0         |  |
| M1     | P10           | 0         |  |
| M1     | P11           | 0         |  |
| M1     | P12           | 0         |  |
| M1     | P14           | 0         |  |
| M1     | P16           | 0         |  |
| M1     | P17           | 0         |  |
| M1     | P18           | 0         |  |
| M1     | P20           | 0         |  |
| M1     | P22           | 0         |  |
| M1     | P23           | 0         |  |
| M1     | P24           | 0         |  |
| M1     | P26           | 0         |  |
| M1     | P2            | 0.833     |  |
| M1     | P3            | 1         |  |
| M1     | P4            | 1         |  |
| M1     | P5            | 1         |  |
| M1     | P6            | 1         |  |
| M1     | P7            | 1         |  |
| M1     | P13           | 1         |  |
| M1     | P15           | 1         |  |
| M1     | P19           | 1         |  |
| M1     | P21           | 1         |  |
| M1     | P25           | 1         |  |
| M1     | P27           | 1         |  |
| M1     | P28           | 0.8       |  |
| M1     | P29           | 1         |  |
| M2     | P1            | 0.667     |  |
| M2     | P8            | 0.5       |  |
| M2     | P9            | 0.5       |  |
| M2     | P10           | 1         |  |
| M2     | P11           | 1         |  |
| M2     | P12           | 1         |  |
| M2     | P14           | 1         |  |
| M2     | P16           | 0.5       |  |
| M2     | P17           | 1         |  |
| M2     | P18           | 1         |  |
| M2     | P20           | 1         |  |
| M2     | P22           | 1         |  |
| M2     | P23           | 1         |  |
| M2     | P24           | 1         |  |
| M2     | P26           | 1         |  |
| M2     | P2            | 0         |  |
| M2     | P3            | 0         |  |
| M2     | P4            | 0.167     |  |
| M2     | P5            | 0         |  |
| M2     | P6            | 0         |  |

|    |     |       |  |
|----|-----|-------|--|
| M2 | P7  | 0     |  |
| M2 | P13 | 0     |  |
| M2 | P15 | 0     |  |
| M2 | P19 | 0     |  |
| M2 | P21 | 0     |  |
| M2 | P25 | 0     |  |
| M2 | P27 | 0     |  |
| M2 | P28 | 0     |  |
| M2 | P29 | 0     |  |
| M3 | P1  | 1     |  |
| M3 | P8  | 1     |  |
| M3 | P9  | 1     |  |
| M3 | P10 | 1     |  |
| M3 | P11 | 1     |  |
| M3 | P12 | 1     |  |
| M3 | P14 | 1     |  |
| M3 | P16 | 0.5   |  |
| M3 | P17 | 1     |  |
| M3 | P18 | 0.667 |  |
| M3 | P20 | 1     |  |
| M3 | P22 | 0.5   |  |
| M3 | P23 | 1     |  |
| M3 | P24 | 1     |  |
| M3 | P26 | 1     |  |
| M3 | P2  | 0     |  |
| M3 | P3  | 0     |  |
| M3 | P4  | 0     |  |
| M3 | P5  | 0     |  |
| M3 | P6  | 0     |  |
| M3 | P7  | 0     |  |
| M3 | P13 | 0     |  |
| M3 | P15 | 0     |  |
| M3 | P19 | 0     |  |
| M3 | P21 | 0     |  |
| M3 | P25 | 0     |  |
| M3 | P27 | 0     |  |
| M3 | P28 | 0     |  |
| M3 | P29 | 0     |  |
| M4 | P1  | 0.5   |  |
| M4 | P8  | 1     |  |
| M4 | P9  | 0.5   |  |
| M4 | P10 | 0.8   |  |
| M4 | P11 | 1     |  |
| M4 | P12 | 1     |  |
| M4 | P14 | 1     |  |
| M4 | P16 | 0.833 |  |
| M4 | P17 | 1     |  |
| M4 | P18 | 1     |  |
| M4 | P20 | 1     |  |
| M4 | P22 | 1     |  |
| M4 | P23 | 0.857 |  |
| M4 | P24 | 0.75  |  |
| M4 | P26 | 1     |  |
| M4 | P2  | 0     |  |
| M4 | P3  | 0.5   |  |
| M4 | P4  | 0     |  |
| M4 | P5  | 0     |  |
| M4 | P6  | 0     |  |

|    |     |       |  |
|----|-----|-------|--|
| M4 | P7  | 0     |  |
| M4 | P13 | 0     |  |
| M4 | P15 | 0     |  |
| M4 | P19 | 0     |  |
| M4 | P21 | 0     |  |
| M4 | P25 | 0     |  |
| M4 | P27 | 0     |  |
| M4 | P28 | 0     |  |
| M4 | P29 | 0     |  |
| M5 | P1  | 0.8   |  |
| M5 | P8  | 0.5   |  |
| M5 | P9  | 1     |  |
| M5 | P10 | 1     |  |
| M5 | P11 | 1     |  |
| M5 | P12 | 1     |  |
| M5 | P14 | 1     |  |
| M5 | P16 | 0.5   |  |
| M5 | P17 | 1     |  |
| M5 | P18 | 1     |  |
| M5 | P20 | 1     |  |
| M5 | P22 | 1     |  |
| M5 | P23 | 0.5   |  |
| M5 | P24 | 1     |  |
| M5 | P26 | 1     |  |
| M5 | P2  | 0     |  |
| M5 | P3  | 0     |  |
| M5 | P4  | 0     |  |
| M5 | P5  | 0     |  |
| M5 | P6  | 0     |  |
| M5 | P7  | 0     |  |
| M5 | P13 | 0     |  |
| M5 | P15 | 0     |  |
| M5 | P19 | 0     |  |
| M5 | P21 | 0     |  |
| M5 | P25 | 0     |  |
| M5 | P27 | 0     |  |
| M5 | P28 | 0     |  |
| M5 | P29 | 0     |  |
| M6 | P1  | 1     |  |
| M6 | P8  | 0.667 |  |
| M6 | P9  | 0.5   |  |
| M6 | P10 | 0.5   |  |
| M6 | P11 | 0.5   |  |
| M6 | P12 | 0.75  |  |
| M6 | P14 | 0.667 |  |
| M6 | P16 | 0.667 |  |
| M6 | P17 | 0.667 |  |
| M6 | P18 | 0.5   |  |
| M6 | P20 | 0.5   |  |
| M6 | P22 | 0.667 |  |
| M6 | P23 | 0.667 |  |
| M6 | P24 | 0.667 |  |
| M6 | P26 | 0.5   |  |
| M6 | P2  | 0     |  |
| M6 | P3  | 0     |  |
| M6 | P4  | 0     |  |
| M6 | P5  | 0     |  |
| M6 | P6  | 0     |  |

|    |     |       |  |
|----|-----|-------|--|
| M6 | P7  | 0     |  |
| M6 | P13 | 0     |  |
| M6 | P15 | 0     |  |
| M6 | P19 | 0     |  |
| M6 | P21 | 0     |  |
| M6 | P25 | 0     |  |
| M6 | P27 | 0     |  |
| M6 | P28 | 0     |  |
| M6 | P29 | 0     |  |
| M7 | P1  | 1     |  |
| M7 | P8  | 1     |  |
| M7 | P9  | 1     |  |
| M7 | P10 | 0.667 |  |
| M7 | P11 | 1     |  |
| M7 | P12 | 1     |  |
| M7 | P14 | 1     |  |
| M7 | P16 | 0.667 |  |
| M7 | P17 | 0.6   |  |
| M7 | P18 | 1     |  |
| M7 | P20 | 0.8   |  |
| M7 | P22 | 1     |  |
| M7 | P23 | 0.5   |  |
| M7 | P24 | 1     |  |
| M7 | P26 | 0.6   |  |
| M7 | P2  | 0     |  |
| M7 | P3  | 0     |  |
| M7 | P4  | 0     |  |
| M7 | P5  | 0     |  |
| M7 | P6  | 0     |  |
| M7 | P7  | 0     |  |
| M7 | P13 | 0     |  |
| M7 | P15 | 0     |  |
| M7 | P19 | 0     |  |
| M7 | P21 | 0     |  |
| M7 | P25 | 0     |  |
| M7 | P27 | 0     |  |
| M7 | P28 | 0     |  |
| M7 | P29 | 0     |  |
| M8 | P1  | 0     |  |
| M8 | P8  | 0     |  |
| M8 | P9  | 0     |  |
| M8 | P10 | 0     |  |
| M8 | P11 | 0     |  |
| M8 | P12 | 0     |  |
| M8 | P14 | 0     |  |
| M8 | P16 | 0     |  |
| M8 | P17 | 0     |  |
| M8 | P18 | 0     |  |
| M8 | P20 | 0     |  |
| M8 | P22 | 0     |  |
| M8 | P23 | 0     |  |
| M8 | P24 | 0     |  |
| M8 | P26 | 0     |  |
| M8 | P2  | 1     |  |
| M8 | P3  | 1     |  |
| M8 | P4  | 0.25  |  |
| M8 | P5  | 1     |  |
| M8 | P6  | 1     |  |

|     |     |       |  |
|-----|-----|-------|--|
| M8  | P7  | 1     |  |
| M8  | P13 | 1     |  |
| M8  | P15 | 0.5   |  |
| M8  | P19 | 0.75  |  |
| M8  | P21 | 0.5   |  |
| M8  | P25 | 1     |  |
| M8  | P27 | 1     |  |
| M8  | P28 | 1     |  |
| M8  | P29 | 1     |  |
| M9  | P1  | 0     |  |
| M9  | P8  | 0     |  |
| M9  | P9  | 0     |  |
| M9  | P10 | 0     |  |
| M9  | P11 | 0     |  |
| M9  | P12 | 0     |  |
| M9  | P14 | 0     |  |
| M9  | P16 | 0     |  |
| M9  | P17 | 0     |  |
| M9  | P18 | 0     |  |
| M9  | P20 | 0     |  |
| M9  | P22 | 0     |  |
| M9  | P23 | 0     |  |
| M9  | P24 | 0     |  |
| M9  | P26 | 0     |  |
| M9  | P2  | 0.667 |  |
| M9  | P3  | 0.5   |  |
| M9  | P4  | 0.5   |  |
| M9  | P5  | 0.5   |  |
| M9  | P6  | 1     |  |
| M9  | P7  | 1     |  |
| M9  | P13 | 1     |  |
| M9  | P15 | 1     |  |
| M9  | P19 | 0.667 |  |
| M9  | P21 | 0.6   |  |
| M9  | P25 | 1     |  |
| M9  | P27 | 0.5   |  |
| M9  | P28 | 1     |  |
| M9  | P29 | 0.667 |  |
| M10 | P1  | 0     |  |
| M10 | P8  | 0     |  |
| M10 | P9  | 0     |  |
| M10 | P10 | 0     |  |
| M10 | P11 | 0     |  |
| M10 | P12 | 0     |  |
| M10 | P14 | 0     |  |
| M10 | P16 | 0     |  |
| M10 | P17 | 0     |  |
| M10 | P18 | 0     |  |
| M10 | P20 | 0     |  |
| M10 | P22 | 0     |  |
| M10 | P23 | 0     |  |
| M10 | P24 | 0     |  |
| M10 | P26 | 0     |  |
| M10 | P2  | 1     |  |
| M10 | P3  | 1     |  |
| M10 | P4  | 0.75  |  |
| M10 | P5  | 0.5   |  |
| M10 | P6  | 1     |  |

|     |      |       |  |
|-----|------|-------|--|
| M10 | P7   | 0.571 |  |
| M10 | P13  | 0.2   |  |
| M10 | P15  | 0     |  |
| M10 | P19  | 0.8   |  |
| M10 | P21  | 0.5   |  |
| M10 | P25  | 0.4   |  |
| M10 | P27  | 0.5   |  |
| M10 | P28  | 1     |  |
| M10 | P29  | 1     |  |
| M11 | P1   | 0     |  |
| M11 | P8   | 0     |  |
| M11 | P9   | 0     |  |
| M11 | P10  | 0     |  |
| M11 | P11  | 0     |  |
| M11 | P12  | 0     |  |
| M11 | P14  | 0     |  |
| M11 | P16  | 0     |  |
| M11 | P17  | 0     |  |
| M11 | P18  | 0     |  |
| M11 | P20  | 0     |  |
| M11 | P22  | 0     |  |
| M11 | P23  | 0     |  |
| M11 | P24  | 0     |  |
| M11 | p-26 | 0.5   |  |
| M11 | P2   | 0.5   |  |
| M11 | P3   | 0.75  |  |
| M11 | P4   | 1     |  |
| M11 | P5   | 0.25  |  |
| M11 | P6   | 1     |  |
| M11 | P7   | 1     |  |
| M11 | P13  | 1     |  |
| M11 | P15  | 0.5   |  |
| M11 | P19  | 0.833 |  |
| M11 | P21  | 0.125 |  |
| M11 | P25  | 0.5   |  |
| M11 | P27  | 1     |  |
| M11 | P28  | 1     |  |
| M11 | P29  | 0.5   |  |
| M12 | P1   | 0     |  |
| M12 | P8   | 0     |  |
| M12 | P9   | 0     |  |
| M12 | P10  | 0     |  |
| M12 | P11  | 0     |  |
| M12 | P12  | 0     |  |
| M12 | P14  | 0     |  |
| M12 | P16  | 0     |  |
| M12 | P17  | 0     |  |
| M12 | P18  | 0     |  |
| M12 | P20  | 0     |  |
| M12 | P22  | 0.5   |  |
| M12 | P23  | 0     |  |
| M12 | P24  | 0     |  |
| M12 | P26  | 0     |  |
| M12 | P2   | 1     |  |
| M12 | P3   | 1     |  |
| M12 | P4   | 1     |  |
| M12 | P5   | 1     |  |
| M12 | P6   | 1     |  |

|     |     |       |  |
|-----|-----|-------|--|
| M12 | P7  | 1     |  |
| M12 | P13 | 1     |  |
| M12 | P15 | 1     |  |
| M12 | P19 | 1     |  |
| M12 | P21 | 1     |  |
| M12 | P25 | 1     |  |
| M12 | P27 | 1     |  |
| M12 | P28 | 0.5   |  |
| M12 | P29 | 1     |  |
| M13 | P1  | 1     |  |
| M13 | P8  | 1     |  |
| M13 | P9  | 1     |  |
| M13 | P10 | 1     |  |
| M13 | P11 | 1     |  |
| M13 | P12 | 1     |  |
| M13 | P14 | 1     |  |
| M13 | P16 | 0.667 |  |
| M13 | P17 | 1     |  |
| M13 | P18 | 0.333 |  |
| M13 | P20 | 1     |  |
| M13 | P22 | 1     |  |
| M13 | P23 | 1     |  |
| M13 | P24 | 0.5   |  |
| M13 | P26 | 0.667 |  |
| M13 | P2  | 0     |  |
| M13 | P3  | 0     |  |
| M13 | P4  | 0     |  |
| M13 | P5  | 0     |  |
| M13 | P6  | 0     |  |
| M13 | P7  | 0     |  |
| M13 | P13 | 0     |  |
| M13 | P15 | 0     |  |
| M13 | P19 | 0     |  |
| M13 | P21 | 0     |  |
| M13 | P25 | 0     |  |
| M13 | P27 | 0     |  |
| M13 | P28 | 0     |  |
| M13 | P29 | 0     |  |
| M14 | P1  | 0     |  |
| M14 | P8  | 0     |  |
| M14 | P9  | 0     |  |
| M14 | P10 | 0     |  |
| M14 | P11 | 0     |  |
| M14 | P12 | 0     |  |
| M14 | P14 | 0     |  |
| M14 | P16 | 0     |  |
| M14 | P17 | 0     |  |
| M14 | P18 | 0     |  |
| M14 | P20 | 0     |  |
| M14 | P22 | 0     |  |
| M14 | P23 | 0     |  |
| M14 | P24 | 0     |  |
| M14 | P26 | 0     |  |
| M14 | P2  | 0.6   |  |
| M14 | P3  | 0.6   |  |
| M14 | P4  | 0.2   |  |
| M14 | P5  | 1     |  |
| M14 | P6  | 0.6   |  |

|     |     |       |  |
|-----|-----|-------|--|
| M14 | P7  | 0.6   |  |
| M14 | P13 | 0.4   |  |
| M14 | P15 | 0.6   |  |
| M14 | P19 | 0.4   |  |
| M14 | P21 | 0.75  |  |
| M14 | P25 | 0.6   |  |
| M14 | P27 | 0.8   |  |
| M14 | P28 | 0.2   |  |
| M14 | P29 | 0.4   |  |
| M15 | P1  | 1     |  |
| M15 | P8  | 1     |  |
| M15 | P9  | 0.5   |  |
| M15 | P10 | 0.25  |  |
| M15 | P11 | 0.2   |  |
| M15 | P12 | 0.5   |  |
| M15 | P14 | 0.167 |  |
| M15 | P16 | 1     |  |
| M15 | P17 | 0.667 |  |
| M15 | P18 | 0.4   |  |
| M15 | P20 | 1     |  |
| M15 | P22 | 1     |  |
| M15 | P23 | 1     |  |
| M15 | P24 | 0     |  |
| M15 | P26 | 0.5   |  |
| M15 | P2  | 0     |  |
| M15 | P3  | 0     |  |
| M15 | P4  | 0     |  |
| M15 | P5  | 0     |  |
| M15 | P6  | 0     |  |
| M15 | P7  | 0     |  |
| M15 | P13 | 0     |  |
| M15 | P15 | 0     |  |
| M15 | P19 | 0     |  |
| M15 | P21 | 0     |  |
| M15 | P25 | 0     |  |
| M15 | P27 | 0     |  |
| M15 | P28 | 0     |  |
| M15 | P29 | 0     |  |
| M16 | P1  | 0     |  |
| M16 | P8  | 0     |  |
| M16 | P9  | 0     |  |
| M16 | P10 | 0     |  |
| M16 | P11 | 0     |  |
| M16 | P12 | 0     |  |
| M16 | P14 | 0     |  |
| M16 | P16 | 0     |  |
| M16 | P17 | 0     |  |
| M16 | P18 | 0     |  |
| M16 | P20 | 0     |  |
| M16 | P22 | 0     |  |
| M16 | P23 | 0     |  |
| M16 | P24 | 0     |  |
| M16 | P26 | 0     |  |
| M16 | P2  | 0.8   |  |
| M16 | P3  | 1     |  |
| M16 | P4  | 1     |  |
| M16 | P5  | 1     |  |
| M16 | P6  | 1     |  |

|     |     |       |  |
|-----|-----|-------|--|
| M16 | P7  | 0.5   |  |
| M16 | P13 | 0.333 |  |
| M16 | P15 | 0.667 |  |
| M16 | P19 | 0.6   |  |
| M16 | P21 | 1     |  |
| M16 | P25 | 1     |  |
| M16 | P27 | 0.5   |  |
| M16 | P28 | 1     |  |
| M16 | P29 | 1     |  |
| M17 | P1  | 0     |  |
| M17 | P8  | 0     |  |
| M17 | P9  | 0     |  |
| M17 | P10 | 0     |  |
| M17 | P11 | 0     |  |
| M17 | P12 | 0     |  |
| M17 | P14 | 0     |  |
| M17 | P16 | 0     |  |
| M17 | P17 | 0     |  |
| M17 | P18 | 0     |  |
| M17 | P20 | 0     |  |
| M17 | P22 | 0     |  |
| M17 | P23 | 0.167 |  |
| M17 | P24 | 0     |  |
| M17 | P26 | 0     |  |
| M17 | P2  | 1     |  |
| M17 | P3  | 1     |  |
| M17 | P4  | 0     |  |
| M17 | P5  | 1     |  |
| M17 | P6  | 0.286 |  |
| M17 | P7  | 0.5   |  |
| M17 | P13 | 1     |  |
| M17 | P15 | 0.333 |  |
| M17 | P19 | 0.333 |  |
| M17 | P21 | 0.5   |  |
| M17 | P25 | 1     |  |
| M17 | P27 | 1     |  |
| M17 | P28 | 0     |  |
| M17 | P29 | 1     |  |
| M18 | P1  | 0     |  |
| M18 | P8  | 0     |  |
| M18 | P9  | 0     |  |
| M18 | P10 | 0     |  |
| M18 | P11 | 0     |  |
| M18 | P12 | 0     |  |
| M18 | P14 | 0     |  |
| M18 | P16 | 0     |  |
| M18 | P17 | 0     |  |
| M18 | P18 | 0     |  |
| M18 | P20 | 0     |  |
| M18 | P22 | 0     |  |
| M18 | P23 | 0     |  |
| M18 | P24 | 0     |  |
| M18 | P26 | 0     |  |
| M18 | P2  | 1     |  |
| M18 | P3  | 1     |  |
| M18 | P4  | 1     |  |
| M18 | P5  | 0.8   |  |
| M18 | P6  | 1     |  |

|     |     |       |  |
|-----|-----|-------|--|
| M18 | P7  | 1     |  |
| M18 | P13 | 1     |  |
| M18 | P15 | 1     |  |
| M18 | P19 | 1     |  |
| M18 | P21 | 0.5   |  |
| M18 | P25 | 0.8   |  |
| M18 | P27 | 1     |  |
| M18 | P28 | 0.5   |  |
| M18 | P29 | 1     |  |
| M19 | P1  | 0.43  |  |
| M19 | P8  | 0.2   |  |
| M19 | P9  | 0.5   |  |
| M19 | P10 | 0.75  |  |
| M19 | P11 | 0.4   |  |
| M19 | P12 | 0.75  |  |
| M19 | P14 | 1     |  |
| M19 | P16 | 1     |  |
| M19 | P17 | 0.667 |  |
| M19 | P18 | 1     |  |
| M19 | P20 | 0.6   |  |
| M19 | P22 | 1     |  |
| M19 | P23 | 0.75  |  |
| M19 | P24 | 0.75  |  |
| M19 | P26 | 0.6   |  |
| M19 | P2  | 0     |  |
| M19 | P3  | 0     |  |
| M19 | P4  | 0     |  |
| M19 | P5  | 0     |  |
| M19 | P6  | 0     |  |
| M19 | P7  | 0     |  |
| M19 | P13 | 0     |  |
| M19 | P15 | 0     |  |
| M19 | P19 | 0     |  |
| M19 | P21 | 0     |  |
| M19 | P25 | 0     |  |
| M19 | P27 | 0     |  |
| M19 | P28 | 0     |  |
| M19 | P29 | 0     |  |
| M20 | P1  | 0     |  |
| M20 | P8  | 0     |  |
| M20 | P9  | 0     |  |
| M20 | P10 | 0     |  |
| M20 | P11 | 0     |  |
| M20 | P12 | 0     |  |
| M20 | P14 | 0     |  |
| M20 | P16 | 0     |  |
| M20 | P17 | 0     |  |
| M20 | P18 | 0     |  |
| M20 | P20 | 0     |  |
| M20 | P22 | 0     |  |
| M20 | P23 | 0     |  |
| M20 | P24 | 0     |  |
| M20 | P26 | 0     |  |
| M20 | P2  | 0.6   |  |
| M20 | P3  | 0.667 |  |
| M20 | P4  | 1     |  |
| M20 | P5  | 0.5   |  |
| M20 | P6  | 1     |  |

|     |     |       |  |
|-----|-----|-------|--|
| M20 | P7  | 1     |  |
| M20 | P13 | 1     |  |
| M20 | P15 | 0.5   |  |
| M20 | P19 | 1     |  |
| M20 | P21 | 1     |  |
| M20 | P25 | 0.5   |  |
| M20 | P27 | 1     |  |
| M20 | P28 | 0.5   |  |
| M20 | P29 | 1     |  |
| M21 | P1  | 1     |  |
| M21 | P8  | 0.5   |  |
| M21 | P9  | 0.5   |  |
| M21 | P10 | 0.8   |  |
| M21 | P11 | 1     |  |
| M21 | P12 | 1     |  |
| M21 | P14 | 0.75  |  |
| M21 | P16 | 0.5   |  |
| M21 | P17 | 1     |  |
| M21 | P18 | 0.75  |  |
| M21 | P20 | 1     |  |
| M21 | P22 | 0.5   |  |
| M21 | P23 | 0.6   |  |
| M21 | P24 | 1     |  |
| M21 | P26 | 1     |  |
| M21 | P2  | 0     |  |
| M21 | P3  | 0     |  |
| M21 | P4  | 0     |  |
| M21 | P5  | 0     |  |
| M21 | P6  | 0     |  |
| M21 | P7  | 0     |  |
| M21 | P13 | 0     |  |
| M21 | P15 | 0     |  |
| M21 | P19 | 0     |  |
| M21 | P21 | 0     |  |
| M21 | P25 | 0     |  |
| M21 | P27 | 0     |  |
| M21 | P28 | 0     |  |
| M21 | P29 | 0     |  |
| M22 | P1  | 0     |  |
| M22 | P8  | 0     |  |
| M22 | P9  | 0.222 |  |
| M22 | P10 | 0     |  |
| M22 | P11 | 0     |  |
| M22 | P12 | 0     |  |
| M22 | P14 | 0     |  |
| M22 | P16 | 0     |  |
| M22 | P17 | 0     |  |
| M22 | P18 | 0     |  |
| M22 | P20 | 0     |  |
| M22 | P22 | 0     |  |
| M22 | P23 | 0     |  |
| M22 | P24 | 0     |  |
| M22 | P26 | 0     |  |
| M22 | P2  | 1     |  |
| M22 | P3  | 1     |  |
| M22 | P4  | 1     |  |
| M22 | P5  | 1     |  |
| M22 | P6  | 1     |  |

|     |     |       |  |
|-----|-----|-------|--|
| M22 | P7  | 1     |  |
| M22 | P13 | 1     |  |
| M22 | P15 | 1     |  |
| M22 | P19 | 0.8   |  |
| M22 | P21 | 0.833 |  |
| M22 | P25 | 1     |  |
| M22 | P27 | 0.8   |  |
| M22 | P28 | 1     |  |
| M22 | P29 | 1     |  |
| M23 | P1  | 0     |  |
| M23 | P8  | 0     |  |
| M23 | P9  | 0.2   |  |
| M23 | P10 | 0     |  |
| M23 | P11 | 0     |  |
| M23 | P12 | 0.2   |  |
| M23 | P14 | 0     |  |
| M23 | P16 | 0     |  |
| M23 | P17 | 0.2   |  |
| M23 | P18 | 0     |  |
| M23 | P20 | 0     |  |
| M23 | P22 | 0     |  |
| M23 | P23 | 0     |  |
| M23 | P24 | 0     |  |
| M23 | P26 | 0     |  |
| M23 | P2  | 1     |  |
| M23 | P3  | 1     |  |
| M23 | P4  | 1     |  |
| M23 | P5  | 1     |  |
| M23 | P6  | 1     |  |
| M23 | P7  | 1     |  |
| M23 | P13 | 1     |  |
| M23 | P15 | 1     |  |
| M23 | P19 | 1     |  |
| M23 | P21 | 0.667 |  |
| M23 | P25 | 1     |  |
| M23 | P27 | 1     |  |
| M23 | P28 | 1     |  |
| M23 | P29 | 0.8   |  |
| M24 | P1  | 0     |  |
| M24 | P8  | 0     |  |
| M24 | P9  | 0     |  |
| M24 | P10 | 0     |  |
| M24 | P11 | 0     |  |
| M24 | P12 | 0     |  |
| M24 | P14 | 0     |  |
| M24 | P16 | 0     |  |
| M24 | P17 | 0     |  |
| M24 | P18 | 0     |  |
| M24 | P20 | 0     |  |
| M24 | P22 | 0     |  |
| M24 | P23 | 0     |  |
| M24 | P24 | 0     |  |
| M24 | P26 | 0.2   |  |
| M24 | P2  | 1     |  |
| M24 | P3  | 1     |  |
| M24 | P4  | 0.5   |  |
| M24 | P5  | 0.6   |  |
| M24 | P6  | 0.667 |  |

|     |     |       |  |
|-----|-----|-------|--|
| M24 | P7  | 1     |  |
| M24 | P13 | 1     |  |
| M24 | P15 | 0.5   |  |
| M24 | P19 | 0.25  |  |
| M24 | P21 | 0.5   |  |
| M24 | P25 | 1     |  |
| M24 | P27 | 1     |  |
| M24 | P28 | 0.6   |  |
| M24 | P29 | 1     |  |
| M25 | P1  | 0.667 |  |
| M25 | P8  | 0.75  |  |
| M25 | P9  | 1     |  |
| M25 | P10 | 1     |  |
| M25 | P11 | 1     |  |
| M25 | P12 | 1     |  |
| M25 | P14 | 1     |  |
| M25 | P16 | 1     |  |
| M25 | P17 | 1     |  |
| M25 | P18 | 1     |  |
| M25 | P20 | 1     |  |
| M25 | P22 | 1     |  |
| M25 | P23 | 1     |  |
| M25 | P24 | 1     |  |
| M25 | P26 | 0.667 |  |
| M26 | P1  | 0     |  |
| M26 | P8  | 0     |  |
| M26 | P9  | 0     |  |
| M26 | P10 | 0     |  |
| M26 | P11 | 0     |  |
| M26 | P12 | 0     |  |
| M26 | P14 | 0     |  |
| M26 | P16 | 0     |  |
| M26 | P17 | 0     |  |
| M26 | P18 | 0     |  |
| M26 | P20 | 0     |  |
| M26 | P22 | 0     |  |
| M26 | P23 | 0     |  |
| M26 | P24 | 0.167 |  |
| M26 | P26 | 0     |  |
| M26 | P2  | 1     |  |
| M26 | P3  | 1     |  |
| M26 | P4  | 1     |  |
| M26 | P5  | 0.6   |  |
| M26 | P6  | 0.75  |  |
| M26 | P7  | 1     |  |
| M26 | P13 | 1     |  |
| M26 | P15 | 1     |  |
| M26 | P19 | 1     |  |
| M26 | P21 | 1     |  |
| M26 | P25 | 1     |  |
| M26 | P27 | 1     |  |
| M26 | P28 | 0.5   |  |
| M26 | P29 | 0.5   |  |
| M27 | P1  | 1     |  |
| M27 | P8  | 1     |  |
| M27 | P9  | 1     |  |
| M27 | P10 | 1     |  |
| M27 | P11 | 1     |  |

|     |     |       |  |
|-----|-----|-------|--|
| M27 | P12 | 1     |  |
| M27 | P14 | 1     |  |
| M27 | P16 | 1     |  |
| M27 | P17 | 1     |  |
| M27 | P18 | 1     |  |
| M27 | P20 | 1     |  |
| M27 | P22 | 1     |  |
| M27 | P23 | 1     |  |
| M27 | P24 | 1     |  |
| M27 | P26 | 1     |  |
| M27 | P2  | 0     |  |
| M27 | P3  | 0     |  |
| M27 | P4  | 0     |  |
| M27 | P5  | 0.167 |  |
| M27 | P6  | 0     |  |
| M27 | P7  | 0.5   |  |
| M27 | P13 | 0     |  |
| M27 | P15 | 0     |  |
| M27 | P19 | 0     |  |
| M27 | P21 | 0     |  |
| M27 | P25 | 0     |  |
| M27 | P27 | 0     |  |
| M27 | P28 | 0     |  |
| M27 | P29 | 0     |  |
| M28 | P1  | 0.5   |  |
| M28 | P8  | 1     |  |
| M28 | P9  | 1     |  |
| M28 | P10 | 0.5   |  |
| M28 | P11 | 0.6   |  |
| M28 | P12 | 0.5   |  |
| M28 | P14 | 0.6   |  |
| M28 | P16 | 0.4   |  |
| M28 | P17 | 1     |  |
| M28 | P18 | 1     |  |
| M28 | P20 | 1     |  |
| M28 | P22 | 1     |  |
| M28 | P23 | 1     |  |
| M28 | P24 | 0.5   |  |
| M28 | P26 | 0.75  |  |
| M28 | P2  | 0.2   |  |
| M28 | P3  | 0     |  |
| M28 | P4  | 0     |  |
| M28 | P5  | 0     |  |
| M28 | P6  | 0     |  |
| M28 | P7  | 0     |  |
| M28 | P13 | 0     |  |
| M28 | P15 | 0     |  |
| M28 | P19 | 0     |  |
| M28 | P21 | 0     |  |
| M28 | P25 | 0     |  |
| M28 | P27 | 0     |  |
| M28 | P28 | 0     |  |
| M28 | P29 | 0     |  |
| M29 | P1  | 1     |  |
| M29 | P8  | 1     |  |
| M29 | P9  | 0.5   |  |
| M29 | P10 | 1     |  |
| M29 | P11 | 1     |  |

|     |     |       |  |
|-----|-----|-------|--|
| M29 | P12 | 1     |  |
| M29 | P14 | 1     |  |
| M29 | P16 | 1     |  |
| M29 | P17 | 1     |  |
| M29 | P18 | 1     |  |
| M29 | P20 | 1     |  |
| M29 | P22 | 1     |  |
| M29 | P23 | 0.8   |  |
| M29 | P24 | 0.5   |  |
| M29 | P26 | 1     |  |
| M29 | P2  | 0     |  |
| M29 | P3  | 0     |  |
| M29 | P4  | 0     |  |
| M29 | P5  | 0     |  |
| M29 | P6  | 0     |  |
| M29 | P7  | 0     |  |
| M29 | P13 | 0.25  |  |
| M29 | P15 | 0     |  |
| M29 | P19 | 0.333 |  |
| M29 | P21 | 0     |  |
| M29 | P25 | 0.25  |  |
| M29 | P27 | 0     |  |
| M29 | P28 | 0     |  |
| M29 | P29 | 0     |  |
|     |     |       |  |

---

---
