# Supplementary material
Source: publisher figshare collection journal article supplement (https://tandf.figshare.com/articles/dataset/_/7924361)
Supplement: Supplementary file 8 [file 1 › tplb_a_1587540_sm8623.pdf]

Database S7 from Biplot approach with self-incompatibility analyses of sib diallel cross data for *Lysimachia monelli* (Primulaceae)

Database S7. *Lysimachia monelli* diallel D6 Info-Gen database.  
Genotype Environment Interaction [Version 15/09/2013]

| Mother | Father-pollen | Fruit set |
|--------|---------------|-----------|
| M1     | P1            | 0         |
| M1     | P7            | 0         |
| M1     | P10           | 0         |
| M1     | P13           | 0.33      |
| M1     | P18           | 0         |
| M1     | P2            | 1         |
| M1     | P5            | 1         |
| M1     | P8            | 1         |
| M1     | P9            | 1         |
| M1     | P12           | 1         |
| M1     | P3            | 1         |
| M1     | P4            | 1         |
| M1     | P6            | 1         |
| M1     | P11           | 1         |
| M1     | P15           | 1         |
| M1     | P16           | 1         |
| M1     | P17           | 1         |
| M2     | P1            | 1         |
| M2     | P7            | 1         |
| M2     | P10           | 1         |
| M2     | P13           | 1         |
| M2     | P18           | 0.66      |
| M2     | P2            | 0         |
| M2     | P5            | 0.143     |
| M2     | P8            | 0         |
| M2     | P9            | 0         |
| M2     | P12           | 0         |
| M2     | P3            | 1         |
| M2     | P4            | 1         |
| M2     | P6            | 1         |
| M2     | P11           | 1         |
| M2     | P15           | 1         |
| M2     | P16           | 1         |
| M2     | P17           | 1         |
| M3     | P1            | 1         |
| M3     | P7            | 1         |
| M3     | P10           | 1         |
| M3     | P13           | 1         |
| M3     | P18           | 1         |
| M3     | P2            | 1         |
| M3     | P5            | 1         |
| M3     | P8            | 1         |
| M3     | P9            | 1         |
| M3     | P12           | 1         |
| M3     | P3            | 0         |
| M3     | P4            | 0         |
| M3     | P6            | 0         |
| M3     | P11           | 0         |
| M3     | P15           | 0         |
| M3     | P16           | 1         |
| M3     | P17           | 1         |
| M4     | P1            | 0.5       |
| M4     | P7            | 1         |

|    |     |       |
|----|-----|-------|
| M4 | P10 | 1     |
| M4 | P13 | 1     |
| M4 | P18 | 1     |
| M4 | P2  | 0.6   |
| M4 | P5  | 1     |
| M4 | P8  | 0.75  |
| M4 | P9  | 1     |
| M4 | P12 | 1     |
| M4 | P3  | 0     |
| M4 | P4  | 0     |
| M4 | P6  | 0     |
| M4 | P11 | 0     |
| M4 | P15 | 0     |
| M4 | P16 | 1     |
| M4 | P17 | 1     |
| M5 | P1  | 1     |
| M5 | P7  | 1     |
| M5 | P10 | 1     |
| M5 | P13 | 1     |
| M5 | P18 | 1     |
| M5 | P2  | 0     |
| M5 | P5  | 0     |
| M5 | P8  | 0.143 |
| M5 | P9  | 0     |
| M5 | P12 | 0.181 |
| M5 | P3  | 1     |
| M5 | P4  | 1     |
| M5 | P6  | 1     |
| M5 | P11 | 1     |
| M5 | P15 | 0.5   |
| M5 | P16 | 1     |
| M5 | P17 | 1     |
| M6 | P1  | 1     |
| M6 | P7  | 1     |
| M6 | P10 | 1     |
| M6 | P13 | 1     |
| M6 | P18 | 1     |
| M6 | P2  | 1     |
| M6 | P5  | 1     |
| M6 | P8  | 1     |
| M6 | P9  | 1     |
| M6 | P12 | 1     |
| M6 | P3  | 0     |
| M6 | P4  | 0     |
| M6 | P6  | 0     |
| M6 | P11 | 0     |
| M6 | P15 | 0     |
| M6 | P16 | 1     |
| M6 | P17 | 1     |
| M7 | P1  | 0     |
| M7 | P7  | 0     |
| M7 | P10 | 0     |
| M7 | P13 | 0     |
| M7 | P18 | 0     |
| M7 | P2  | 1     |
| M7 | P5  | 1     |
| M7 | P8  | 1     |
| M7 | P9  | 1     |
| M7 | P12 | 1     |
| M7 | P3  | 1     |
| M7 | P4  | 1     |
| M7 | P6  | 1     |

|     |     |       |
|-----|-----|-------|
| M7  | P11 | 1     |
| M7  | P15 | 1     |
| M7  | P16 | 1     |
| M7  | P17 | 1     |
| M8  | P1  | 1     |
| M8  | P7  | 1     |
| M8  | P10 | 1     |
| M8  | P13 | 1     |
| M8  | P18 | 1     |
| M8  | P2  | 0     |
| M8  | P5  | 0     |
| M8  | P8  | 0     |
| M8  | P9  | 0     |
| M8  | P12 | 0     |
| M8  | P3  | 1     |
| M8  | P4  | 1     |
| M8  | P6  | 1     |
| M8  | P11 | 1     |
| M8  | P15 | 0.5   |
| M8  | P16 | 1     |
| M8  | P17 | 1     |
| M9  | P1  | 1     |
| M9  | P7  | 1     |
| M9  | P10 | 1     |
| M9  | P13 | 1     |
| M9  | P18 | 1     |
| M9  | P2  | 0     |
| M9  | P5  | 0.286 |
| M9  | P8  | 0     |
| M9  | P9  | 0     |
| M9  | P12 | 0     |
| M9  | P3  | 1     |
| M9  | P4  | 1     |
| M9  | P6  | 1     |
| M9  | P11 | 1     |
| M9  | P15 | 1     |
| M9  | P16 | 1     |
| M9  | P17 | 1     |
| M10 | P1  | 0.33  |
| M10 | P7  | 0     |
| M10 | P10 | 0     |
| M10 | P13 | 0     |
| M10 | P18 | 0     |
| M10 | P2  | 1     |
| M10 | P5  | 1     |
| M10 | P8  | 1     |
| M10 | P9  | 1     |
| M10 | P12 | 1     |
| M10 | P3  | 1     |
| M10 | P4  | 1     |
| M10 | P6  | 1     |
| M10 | P11 | 1     |
| M10 | P15 | 1     |
| M10 | P16 | 1     |
| M10 | P17 | 1     |
| M11 | P1  | 1     |
| M11 | P7  | 1     |
| M11 | P10 | 1     |
| M11 | P13 | 1     |
| M11 | P18 | 1     |
| M11 | P2  | 1     |
| M11 | P5  | 1     |

|     |     |       |
|-----|-----|-------|
| M11 | P8  | 1     |
| M11 | P9  | 1     |
| M11 | P12 | 1     |
| M11 | P3  | 0     |
| M11 | P4  | 0     |
| M11 | P6  | 0     |
| M11 | P11 | 0     |
| M11 | P15 | 0     |
| M11 | P16 | 1     |
| M11 | P17 | 1     |
| M12 | P1  | 1     |
| M12 | P7  | 1     |
| M12 | P10 | 1     |
| M12 | P13 | 1     |
| M12 | P18 | 1     |
| M12 | P2  | 0     |
| M12 | P5  | 0     |
| M12 | P8  | 0     |
| M12 | P9  | 0.143 |
| M12 | P12 | 0     |
| M12 | P3  | 1     |
| M12 | P4  | 1     |
| M12 | P6  | 1     |
| M12 | P11 | 1     |
| M12 | P15 | 1     |
| M12 | P16 | 1     |
| M12 | P17 | 1     |
| M13 | P1  | 0     |
| M13 | P7  | 0     |
| M13 | P10 | 0     |
| M13 | P13 | 0     |
| M13 | P18 | 0     |
| M13 | P2  | 1     |
| M13 | P5  | 1     |
| M13 | P8  | 0.714 |
| M13 | P9  | 0.75  |
| M13 | P12 | 1     |
| M13 | P3  | 1     |
| M13 | P4  | 1     |
| M13 | P6  | 1     |
| M13 | P11 | 1     |
| M13 | P15 | 1     |
| M13 | P16 | 1     |
| M13 | P17 | 0.666 |
| M15 | P1  | 1     |
| M15 | P7  | 1     |
| M15 | P10 | 1     |
| M15 | P13 | 1     |
| M15 | P18 | 1     |
| M15 | P2  | 1     |
| M15 | P5  | 1     |
| M15 | P8  | 1     |
| M15 | P9  | 1     |
| M15 | P12 | 1     |
| M15 | P3  | 0     |
| M15 | P4  | 0     |
| M15 | P6  | 0.125 |
| M15 | P11 | 0     |
| M15 | P15 | 0     |
| M15 | P16 | 1     |
| M15 | P17 | 1     |
| M16 | P1  | 1     |

|     |     |       |
|-----|-----|-------|
| M16 | P7  | 1     |
| M16 | P10 | 1     |
| M16 | P13 | 1     |
| M16 | P18 | 1     |
| M16 | P2  | 1     |
| M16 | P5  | 1     |
| M16 | P8  | 1     |
| M16 | P9  | 1     |
| M16 | P12 | 1     |
| M16 | P3  | 1     |
| M16 | P4  | 1     |
| M16 | P6  | 1     |
| M16 | P11 | 1     |
| M16 | P15 | 1     |
| M16 | P16 | 0     |
| M16 | P17 | 0.1   |
| M17 | P1  | 1     |
| M17 | P7  | 1     |
| M17 | P10 | 1     |
| M17 | P13 | 1     |
| M17 | P18 | 1     |
| M17 | P2  | 1     |
| M17 | P5  | 1     |
| M17 | P8  | 1     |
| M17 | P9  | 1     |
| M17 | P12 | 1     |
| M17 | P3  | 1     |
| M17 | P4  | 1     |
| M17 | P6  | 1     |
| M17 | P11 | 1     |
| M17 | P15 | 1     |
| M17 | P16 | 0     |
| M17 | P17 | 0     |
| M18 | P1  | 0.167 |
| M18 | P7  | 0     |
| M18 | P10 | 0     |
| M18 | P13 | 0.4   |
| M18 | P18 | 0     |
| M18 | P2  | 1     |
| M18 | P5  | 1     |
| M18 | P8  | 1     |
| M18 | P9  | 1     |
| M18 | P12 | 1     |
| M18 | P3  | 1     |
| M18 | P4  | 1     |
| M18 | P6  | 1     |
| M18 | P11 | 1     |
| M18 | P15 | 0     |
| M18 | P16 | 1     |
| M18 | P17 | 1     |
|     |     |       |

---
