# Supplementary material
Source: publisher figshare collection journal article supplement (https://tandf.figshare.com/articles/dataset/_/7924361)
Supplement: Supplementary file 8 [file 1 › tplb_a_1587540_sm8627.pdf]

**Table S2a from Biplot approach with self-incompatibility analyses of sib diallel cross data for *Lysimachia monelli* (Primulaceae)**

**Table S2a.** *Lysimachia monelli*. Diallel cross D5, results for eigen values, proportion and cumulative proportion. Software Info-Gen, Genotype Environment Interaction [Version 15/09/2013]

| lambda | values  | proportion | cum. prop. |
|--------|---------|------------|------------|
| 1      | 4.81    | 0.88       | 0.88       |
| 2      | 0.12    | 0.02       | 0.90       |
| 3      | 0.10    | 0.02       | 0.92       |
| 4      | 0.08    | 0.01       | 0.93       |
| 5      | 0.07    | 0.01       | 0.94       |
| 6      | 0.06    | 0.01       | 0.95       |
| 7      | 0.04    | 0.01       | 0.96       |
| 8      | 0.04    | 0.01       | 0.97       |
| 9      | 0.03    | 0.01       | 0.97       |
| 10     | 0.02    | 3.9E-03    | 0.98       |
| 11     | 0.02    | 3.7E-03    | 0.98       |
| 12     | 0.02    | 3.2E-03    | 0.98       |
| 13     | 0.02    | 3.0E-03    | 0.99       |
| 14     | 0.01    | 2.7E-03    | 0.99       |
| 15     | 0.01    | 2.3E-03    | 0.99       |
| 16     | 0,01    | 1.6E-03    | 0.99       |
| 17     | 0.01    | 1.6E-03    | 1.00       |
| 18     | 0.01    | 1.2E-03    | 1.00       |
| 19     | 0.01    | 1.1E-03    | 1.00       |
| 20     | 3.5E-03 | 6.4E-04    | 1.00       |
| 21     | 2.7E-03 | 4.8E-04    | 1.00       |
| 22     | 2.2E-03 | 4.0E-04    | 1.00       |
| 23     | 8.3E-04 | 1.5E-04    | 1.00       |
| 24     | 5.4E-04 | 9.8E-05    | 1.00       |
| 25     | 4.5E-04 | 8.1E-05    | 1.00       |
| 26     | 1.5E-04 | 2.6E-05    | 1.00       |
| 27     | 9.8E-05 | 1.8E-05    | 1.00       |
| 28     | 6.6E-05 | 1.2E-05    | 1.00       |
| 29     | 0.00    | 0.00       | 1.00       |
