# Supplementary material
Source: publisher figshare collection journal article supplement (https://tandf.figshare.com/articles/dataset/_/7924361)
Supplement: Supplementary file 8 [file 1 › tplb_a_1587540_sm8628.pdf]

**Table S2b from Biplot approach with self-incompatibility analyses of sib diallel cross data for *Lysimachia monelli* (Primulaceae)**

**Table S2b.** *Lysimachia monelli*. Diallel cross D5R, results for eigen values, proportion and cumulative proportion. Software Info-Gen, Genotype Environment Interaction [Version 15/09/2013]

| lambda | value   | proportion | cum. prop. |
|--------|---------|------------|------------|
| 1      | 1.03    | 0.93       | 0.93       |
| 2      | 0.05    | 0.04       | 0.97       |
| 3      | 0.02    | 0.02       | 0.99       |
| 4      | 0.01    | 0.01       | 1.00       |
| 5      | 3.2E-03 | 2.9E-03    | 1.00       |
| 6      | 1.9E-04 | 1.7E-04    | 1.00       |
| 7      | 0.00    | 0.00       | 1.00       |
