# Supplementary material
Source: publisher figshare collection journal article supplement (https://tandf.figshare.com/articles/dataset/_/7924361)
Supplement: Supplementary file 8 [file 1 › tplb_a_1587540_sm8630.pdf]

**Table S3 from Biplot approach with self-incompatibility analyses of sib diallel cross data for *Lysimachia monelli* (Primulaceae)**

**Table S3.** *Lysimachia monelli*. Diallel cross D6, results for eigen values, proportion and cumulative proportion. Software Info-Gen, Genotype Environment Interaction [Version 15/09/2013]

| lambda | value   | proportion | cum. prop. |
|--------|---------|------------|------------|
| 1      | 1.43    | 0.44       | 0.44       |
| 2      | 1.39    | 0.43       | 0.86       |
| 3      | 0.34    | 0.10       | 0.97       |
| 4      | 0.06    | 0.02       | 0.99       |
| 5      | 0.02    | 0.01       | 0.99       |
| 6      | 0.01    | 2.6E-03    | 1.00       |
| 7      | 0.01    | 2.1E-03    | 1.00       |
| 8      | 3.1E-03 | 9.6E-04    | 1.00       |
| 9      | 2.6E-03 | 8.1E-04    | 1.00       |
| 10     | 1.5E-03 | 4.6E-04    | 1.00       |
| 11     | 7.8E-04 | 2.4E-04    | 1.00       |
| 12     | 5.5E-04 | 1.7E-04    | 1.00       |
| 13     | 8.6E-05 | 2.6E-05    | 1.00       |
| 14     | 0.00    | 0.00       | 1.00       |
| 15     | 0.00    | 0.00       | 1.00       |
| 16     | 0.00    | 0.00       | 1.00       |
| 17     | 0.00    | 0.00       | 1.00       |
